# Supplementary material
Source: PubMed Central journal article supplement (PMC6501338)
Supplement: rsfs20180065supp2.pdf [file rsfs20180065supp2.pdf]

# RIGOLE Posters 2018

## HEAT SHOCK PROTÉIN

Savez-vous ce qui se passe lorsque vous prenez un bain trop chaud (40°C)?  
Il se produit un "Heat Shock". Ce phénomène désignait tout d'abord une augmenta<sup>o</sup> de la température du corps. Puis il a été élargi au terme de stress cellulaire.  
Ce stress, entre autres, provoque la malforma<sup>o</sup> des protéines.

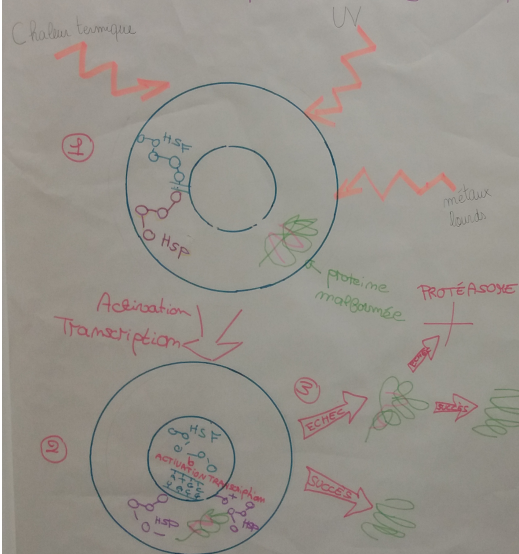

La protéine HSP a un rôle important dans le maintien de l'équilibre cellulaire mais peut avoir des effets négatifs dans certains cas (cellules cancéreuses).

## LES HISTAMINES DANS LE CORPS HUMAIN

**Historique:** découverte dans l'esgot de seigle. Synthétisée en 1907 par A. Windaus & W. Vogt.

**Qu'est-ce que c'est ?**  
 → Molécule de l'organisme qui dérive d'un Acide Aminé, l'HISTIDINE.

**D'où vient-elle ?**  
 → produite dans l'estomac et dans le système immunitaire.

**Son rôle ?**  
 → provoquer la réaction inflammatoire.

**STRUCTURE MOLECULAIRE**  
 $C_5H_9N_3$

NC(=O)CC1=CN=CN1

histidine  
acide aminé

↓ décarboxylation

NCC1=CN=CN1

histamine  
amine

**Fonctionnement des anti-histaminiques (en cas d'allergie)**

récepteurs histaminiques / histamine / paroi sanguine / Anti-histaminique qui se fixe à la place des histamines

**inflammation**

mastocyte → libération histamine → dilatation → chaleur & douleur

pathogène (ou allergène) → macrophage → neutrophile → gonflement → œdème

**Conclusion:**  
 → Histamine, molécule essentielle  
 ⚠️ peut être dangereuse en cas de dysfonctionnement du système immunitaire

## 8. "OPTICAL TWEEZERS" et la STRUCTURE DES BIOMOLÉCULES

### Biomolécules

- \* molécules du vivant
- ↳ composées de Carbone, Hydrogène, Oxygène.  
(ex: ADN, protéines, lipides, glucides, protéines, ...)
- \* et peuvent être "polymère" (ex ADN)
- \* les molécules constituées de longues chaînes sont appelées **macromolécules**

**Piège / pince optique**

laser / lentille convergente / pression de radiation / support

▲ SIMULATION INFORMATIQUE

**Applications des "optical tweezers":**

- 1. élasticité des chaînes (→ notion d'équilibre)
- 2. forces motrices des protéines dans la cellule (microtubules)
- 3. étirer les chaînes pour les étudier (comp, ...)
- 4. forces de liaison (duplets liens)

# RIBO SWITCHES

## RIBOSWITCH: système riborégulateur

- Les riboswitches sont composés d'un aptamère (- 30 à 150 nucléotides) et d'une plateforme d'expression.
- Le riboswitch a la capacité de fixer un métabolite (= protéine, di-amine, molécule) sur son aptamère.
- Le riboswitch est placé avant la partie codante de l'ARN.

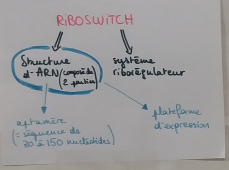

**Conclusion** Les riboswitch ont un effet de régulation sur les protéines (de notre corps). En effet, les riboswitch à l'aide d'un métabolite spécifique à cette dernière peuvent effectuer une action inhibitrice sur la production de protéines (ribosome / traduction) ou alors "créer" une nouvelle portion d'ARN traduite.

Les riboswitch peuvent être un objectif très important des opérations thérapeutiques. Elles permettent d'avoir un meilleur contrôle sur la production de protéines, particulièrement dans notre corps. Par exemple, si notre corps ne met à produire une protéine négative pour nous, l'homme pourrait créer des riboswitches. Le scientifique après avoir étudié les riboswitch, voit si il a une action inhibitrice ou activante et selon à quel métabolite il réagit, il pourrait arrêter la production de cette protéine négative.

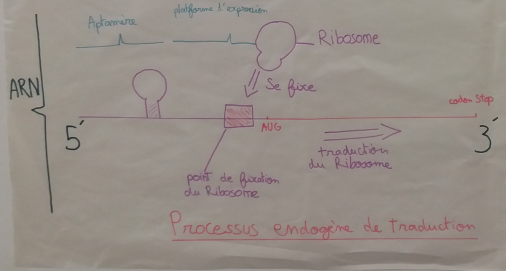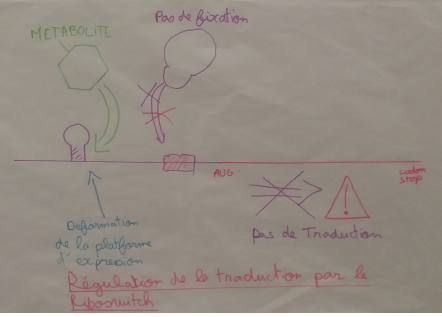

# LES PRIONS

Stanley Prusiner  
(prix Nobel 1997)

ou comment tuer quelqu'un méthodiquement...

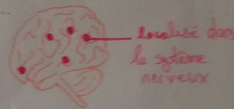

→ Qui est-ce que c'est ?

Une protéine... normale OU anormale

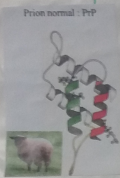

dégradation par hydrolyse  
 $\text{PrP} + \text{H}_2\text{O} \rightarrow \text{Pr} + \text{Pr}$

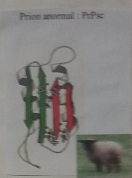

~~Hydrolyse~~  
=> dégradation difficile

$\alpha = \beta$

$\beta \gg \alpha$

→ Comment se fonctionne ?

Transmission par contact

=> Aggrégation jusqu'au système nerveux central

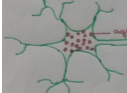

=> Maladie et mort tordologique

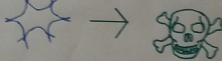

Croissance de type exponentiel

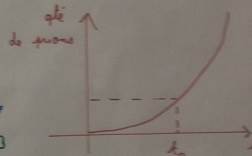

100 symptômes à  $t_0$  (bas fond)

→ Des exemples de maladies

Chez l'animal: la vache folle

=> dégénérescence du système nerveux des bovins

=> contamination par Farines animales

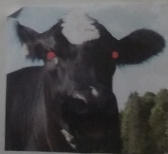

- => Symptômes :
- appréhension
  - hypersensibilité
  - isolation
  - perte poids
  - comportements anormaux

Chez l'Homme: Alzheimer

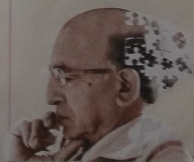

- => Symptômes :
- troubles du langage
  - pertes de mémoire
  - perte de faculté de jugement
  - impossibilité de reconnaître des objets / personnes familières

# LA NICOTINE, À VOS RISQUES ET PÉRILS

Victor, Maylis, Mariom, Adèle

En 1828, Jean Nicot introduit la gomme de nicotine en France. C'est dès longtemps qu'en 1895 découvre la gomme sans nicotine.

L'inhalation est la méthode la plus courante de consommation de la nicotine et celle qui permet la plus grande absorption (80 à 90%).

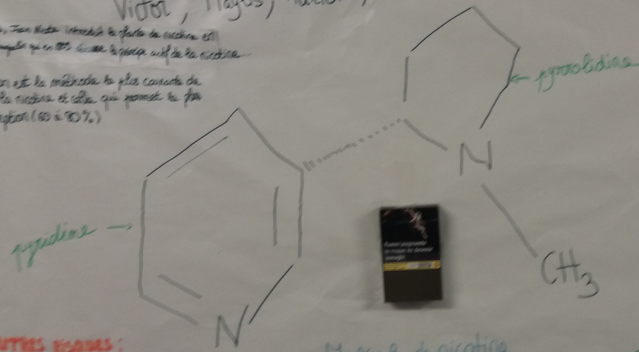

5 AUTRES RISQUES :

le cancer

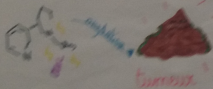

Cependant, la nicotine n'est pas le seul agent nocif de la cigarette.

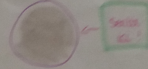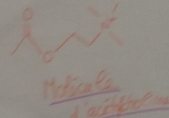

se comporte comme

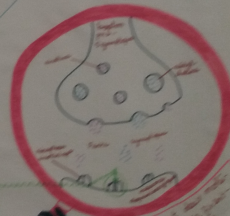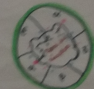

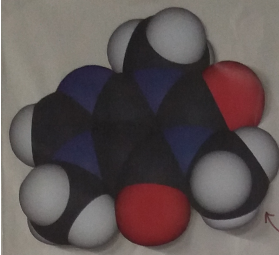

# La caféine, molécule miracle ?

120 000 T/an (Fr)  
paléolithique

1<sup>er</sup> psychoactif ☹️  
1819

## METABOLISATION

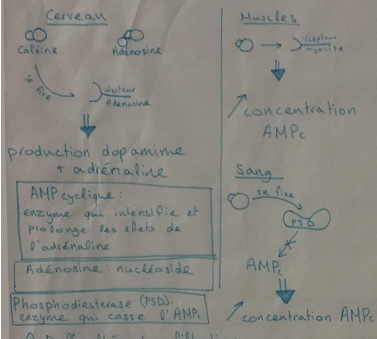

## DEPENDANCE

- Corps s'adapte à une présence continue de caféine.
- Augmente le nombre de récepteurs de l'adénosine du système nerveux central
- Organisme plus sensible à l'adénosine
- 2 conséquences :
  - phénomène d'accoutumance ☹️☹️
  - Si réduction caféine, augmentation des effets physiologiques de l'adénosine et entraîne des symptômes de sevrage importants.

## Applications

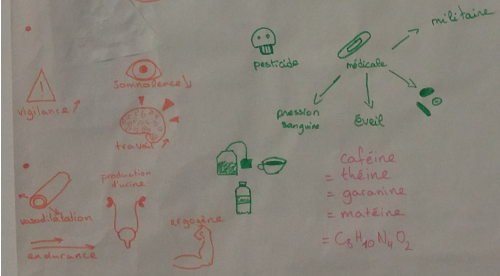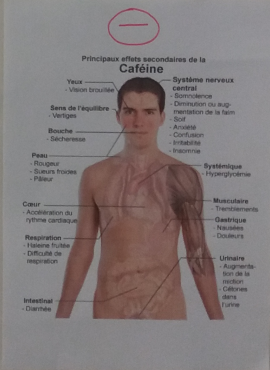

## Conclusion :

La caféine est un stimulant du quotidien, pour ses effets positifs. Elle a d'autres domaines d'application

Cependant, des effets néfastes et une dépendance sont à ne pas négliger dans les cas pathologiques ou d'addiction

# RNA World

Paul, Hanna, Noam, Amir

Le monde ARN (ou RNA World Theory) est une hypothèse élaborée dans les 60's par Carl Woese, Francis Crick et Leslie Orgel selon laquelle une molécule d'ARN primitive serait à l'origine de toutes les formes de vie.

Différents types d'ARN :

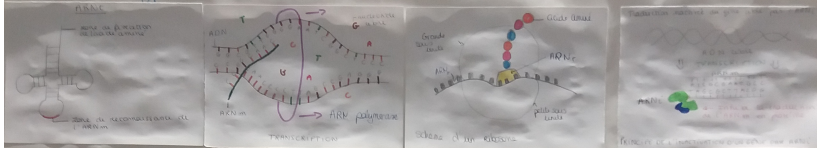

→ ARN de transfert  
↳ transporte les acides aminés.

→ ARN messager  
↳ synthétise les protéines.

→ ARN ribosomique  
↳ compose des ribosomes.

→ ARN interférent  
↳ régule l'expression des gènes.

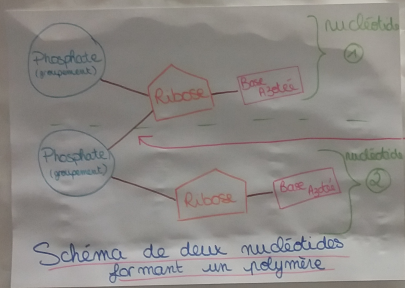

Schéma de deux nucléotides formant un polymère

Liaison Hydrogène :

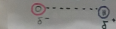

Liaison Phosphodiester :

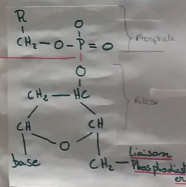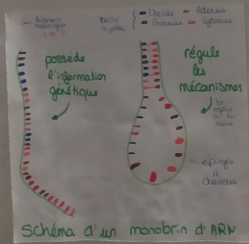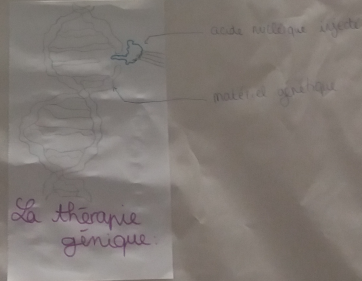

La thérapie génique

Le Monde ARN reste cependant une hypothèse et participe au mystère de la vie.

RIGOLE 2018
