# Supplementary material
Source: PubMed Central journal article supplement (PMC6501338)
Supplement: rsfs20180065supp4.pdf [file rsfs20180065supp4.pdf]

## 2016 survey

1. How satisfied are you of the workshop?

| Group      | Very satisfied | Satisfied | Unsatisfied | Very unsatisfied | No opinion |
|------------|----------------|-----------|-------------|------------------|------------|
| HS seniors | 45%            | 55%       | 0           | 0                | 0          |
| HS juniors | 58%            | 42%       | 0           | 0                | 0          |
| College    | 16%            | 82%       | 0           | 0                | 0          |

2. Did you find teachings clear?

| Group      | Yes | Mostly yes | Mostly no | no |
|------------|-----|------------|-----------|----|
| HS seniors | 60% | 40%        | 0         | 0  |
| HS juniors | 82% | 18%        | 0         | 0  |
| College    | 51% | 49%        | 0         | 0  |

3. How satisfied are you of the global coherence of the workshop?

| Group      | Very satisfied | Satisfied | Unsatisfied | Very unsatisfied | No opinion |
|------------|----------------|-----------|-------------|------------------|------------|
| HS seniors | 25%            | 70%       | 5%          | 0                | 0          |
| HS juniors | 71%            | 29%       | 0           | 0                | 0          |
| College    | 27%            | 70%       | 3%          | 0                | 0          |

4. How did you find the various activities?

| Group      | Interesting | Interesting but not necessarily related to the lectures | Uninteresting |
|------------|-------------|---------------------------------------------------------|---------------|
| HS seniors | 90%         | 10%                                                     | 0             |
| HS juniors | 91%         | 9%                                                      | 0             |
| College    | 90%         | 10%                                                     | 0             |

5. How difficult was the workshop on a scale from 1 to 5 (1: too hard, 5: too easy)?

| Group      | 1 | 2   | 3   | 4   | 5 |
|------------|---|-----|-----|-----|---|
| HS seniors | 0 | 15% | 60% | 25% | 0 |
| HS juniors | 0 | 0   | 52% | 47% | 0 |
| College    | 0 | 27% | 43% | 30% | 0 |

6. Would you recommend the workshop?

100% yes

## 2018 survey

### Initial survey (results given in %)

7. My interest for the subjects proposed in the RIGOLE workshop is:

|           | none | weak | average | strong | exceptional |
|-----------|------|------|---------|--------|-------------|
| Biology   | 0    | 0    | 26      | 36     | 33          |
| Chemistry | 0    | 2    | 19      | 55     | 21          |
| Physics   | 0    | 2    | 17      | 38     | 31          |
| Maths     | 7    | 7    | 17      | 26     | 36          |

8. Evaluate the difficulty level of each subject:

|           | impossibly hard | really hard | hard | a bit hard | easy |
|-----------|-----------------|-------------|------|------------|------|
| Biology   | 0               | 7           | 14   | 40         | 33   |
| Chemistry | 0               | 5           | 17   | 48         | 21   |
| Physics   | 0               | 10          | 26   | 43         | 27   |
| Maths     | 5               | 10          | 29   | 36         | 21   |

9. Assess the importance of each subject for research (all fields):

|           | useless | a bit useful | useful | very useful | necessary |
|-----------|---------|--------------|--------|-------------|-----------|
| Biology   | 0       | 2            | 12     | 21          | 60        |
| Chemistry | 0       | 0            | 7      | 26          | 62        |
| Physics   | 0       | 0            | 2      | 31          | 62        |
| Maths     | 0       | 0            | 10     | 19          | 67        |

10. Assess the importance of each subject for research in biology:

|           | useless | a bit useful | useful | very useful | necessary |
|-----------|---------|--------------|--------|-------------|-----------|
| Chemistry | 0       | 0            | 2      | 36          | 57        |
| Physics   | 0       | 12           | 19     | 52          | 7         |
| Maths     | 0       | 19           | 38     | 29          | 5         |

11. In the future I would like to deepen my knowledge of:

|           | not at all | a bit | some | a lot | absolutely |
|-----------|------------|-------|------|-------|------------|
| Biology   | 10         | 10    | 17   | 24    | 33         |
| Chemistry | 2          | 7     | 26   | 29    | 29         |
| Physics   | 0          | 5     | 33   | 29    | 33         |
| Maths     | 7          | 12    | 24   | 19    | 29         |

## Final survey

1. My interest for the subjects proposed in the RIGOLE workshop is:

|           | none | weak | average | strong | exceptional |
|-----------|------|------|---------|--------|-------------|
| Biology   | 0    | 0    | 14      | 40     | 43          |
| Chemistry | 0    | 2    | 12      | 64     | 21          |
| Physics   | 2    | 0    | 26      | 36     | 33          |
| Maths     | 5    | 14   | 31      | 12     | 33          |

2. Evaluate the difficulty level of each subject:

|           | impossibly hard | really hard | hard | a bit hard | easy |
|-----------|-----------------|-------------|------|------------|------|
| Biology   | 2               | 5           | 31   | 45         | 14   |
| Chemistry | 2               | 10          | 31   | 43         | 12   |
| Physics   | 7               | 12          | 36   | 40         | 2    |
| Maths     | 5               | 12          | 29   | 38         | 14   |

3. Assess the importance of each subject for research (all fields):

|           | useless | a bit useful | useful | very useful | necessary |
|-----------|---------|--------------|--------|-------------|-----------|
| Biology   | 0       | 2            | 12     | 24          | 57        |
| Chemistry | 0       | 0            | 2      | 40          | 57        |
| Physics   | 0       | 0            | 0      | 33          | 64        |
| Maths     | 0       | 0            | 10     | 29          | 60        |

4. Assess the importance of each subject for research in biology:

|           | useless | a bit useful | useful | very useful | necessary |
|-----------|---------|--------------|--------|-------------|-----------|
| Chemistry | 0       | 0            | 0      | 24          | 74        |
| Physics   | 0       | 0            | 14     | 45          | 38        |
| Maths     | 0       | 10           | 29     | 19          | 21        |

5. In the future I would like to deepen my knowledge of:

|           | not at all | a bit | some | a lot | absolutely |
|-----------|------------|-------|------|-------|------------|
| Biology   | 7          | 12    | 14   | 19    | 43         |
| Chemistry | 0          | 12    | 17   | 36    | 26         |
| Physics   | 5          | 5     | 14   | 40    | 31         |
| Maths     | 7          | 14    | 24   | 19    | 31         |

6. The workshop changed my view of:

|           | not at all | a bit | some | a lot | completely |
|-----------|------------|-------|------|-------|------------|
| Biology   | 17         | 24    | 26   | 19    | 12         |
| Chemistry | 14         | 21    | 29   | 24    | 10         |
| Physics   | 17         | 31    | 21   | 27    | 12         |
| Maths     | 31         | 19    | 19   | 2     | 2          |
